# Supplementary material for: Solvothermal synthesis, structure and magnetic properties of heterometallic coordination polymers based on a phenolato-oxamato co-bidentate-tridentate ligand
Source: Royal Society of Chemistry journal article supplement (doi:10.1039/d0dt03269g), 2020-12-08
Supplement: d0dt03269g1.pdf [file d0dt03269g1.pdf]

*Supplementary information for:*

## Solvothermal synthesis, structure and magnetic properties of heterometallic coordination polymers based on a phenolato-oxamato co-bidentate-tridentate ligand

---

Ang Li (李昂), Lise-Marie Chamoreau, Benoît Baptiste, Yanling Li, Yves Journaux and Laurent Lisnard.

---

- Crystal packing of 1.
- TGA of compounds 1-3 performed under air at 5°C/min.
- TGA of compounds 1-3 performed under N<sub>2</sub> at 5°C/min.
- Thermal dependence of the  $\chi_M$  of 1 measured at 200 Oe
- ZFC/FC curves measured at 30 Oe for 1.
- Scheme of the 2D antiferromagnetic ordering
- Magnetic ordering v. dimensionality of a network and magnetic anisotropy

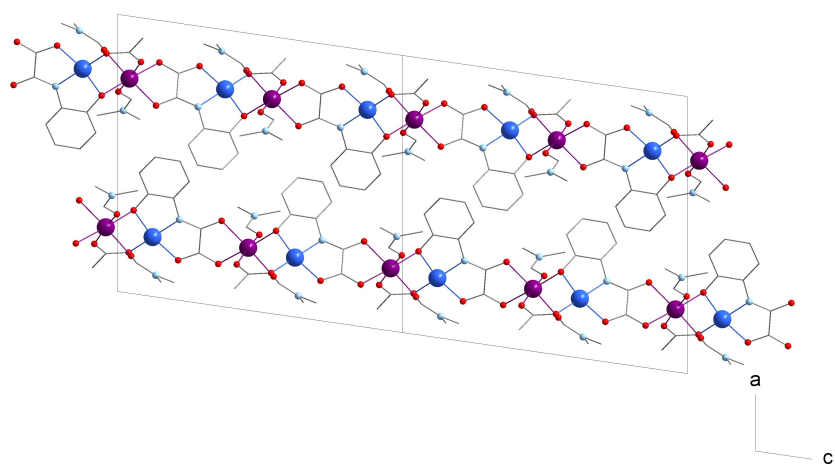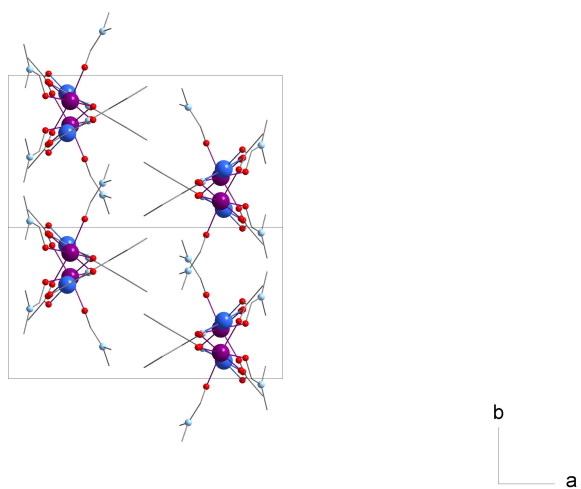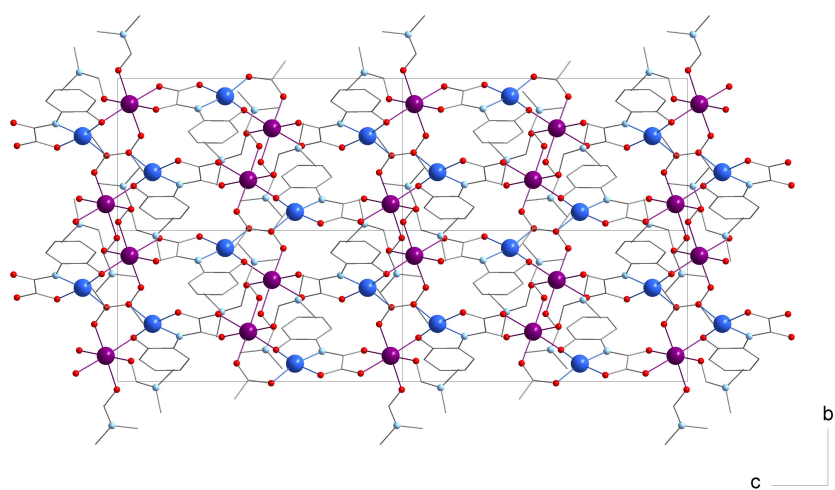

Crystal packing of 1.

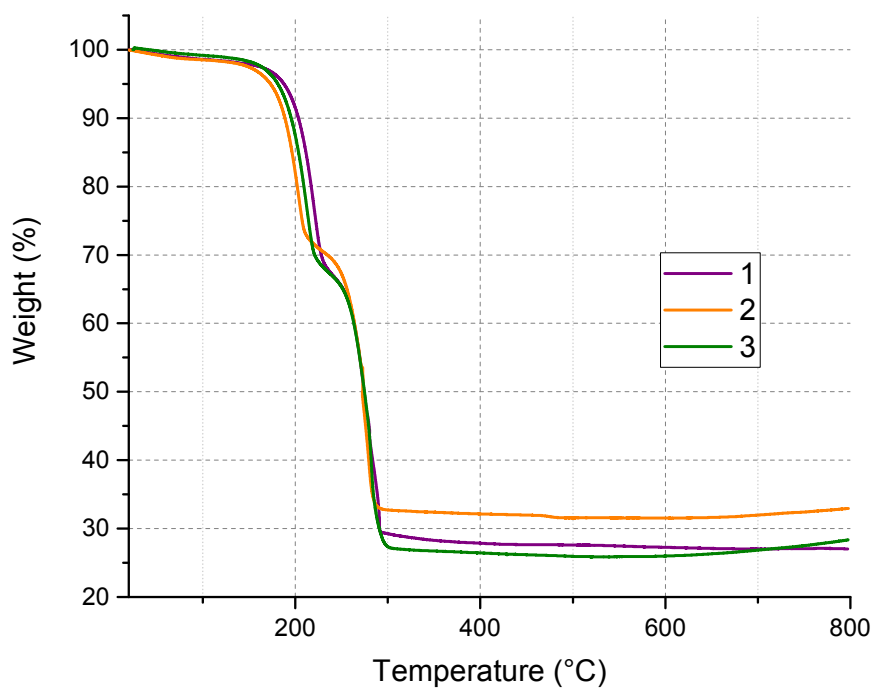

---

TGA of compounds 1-3 performed under air at 5°C/min.

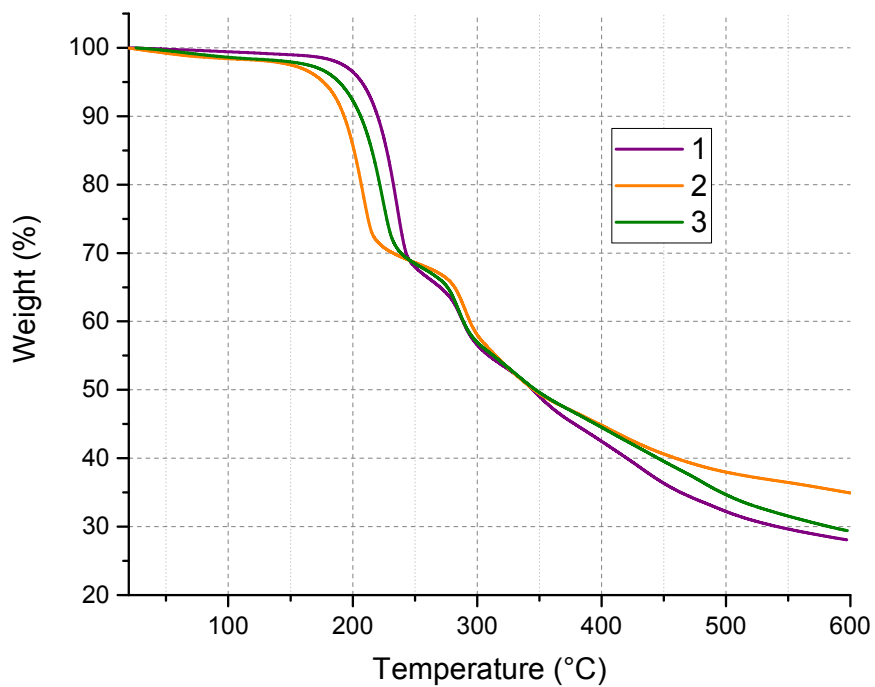

---

TGA of compounds 1-3 performed under N<sub>2</sub> at 5°C/min.

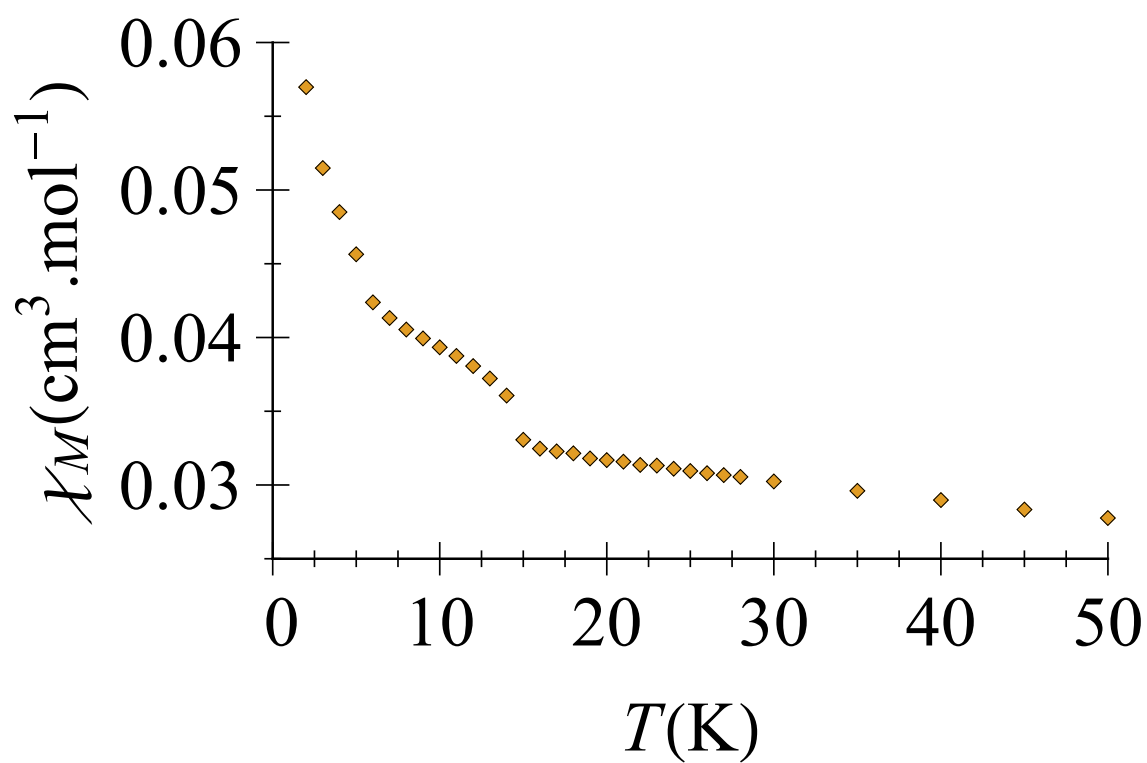

Thermal dependence of the  $\chi_M$  of 1 measured at 200 Oe

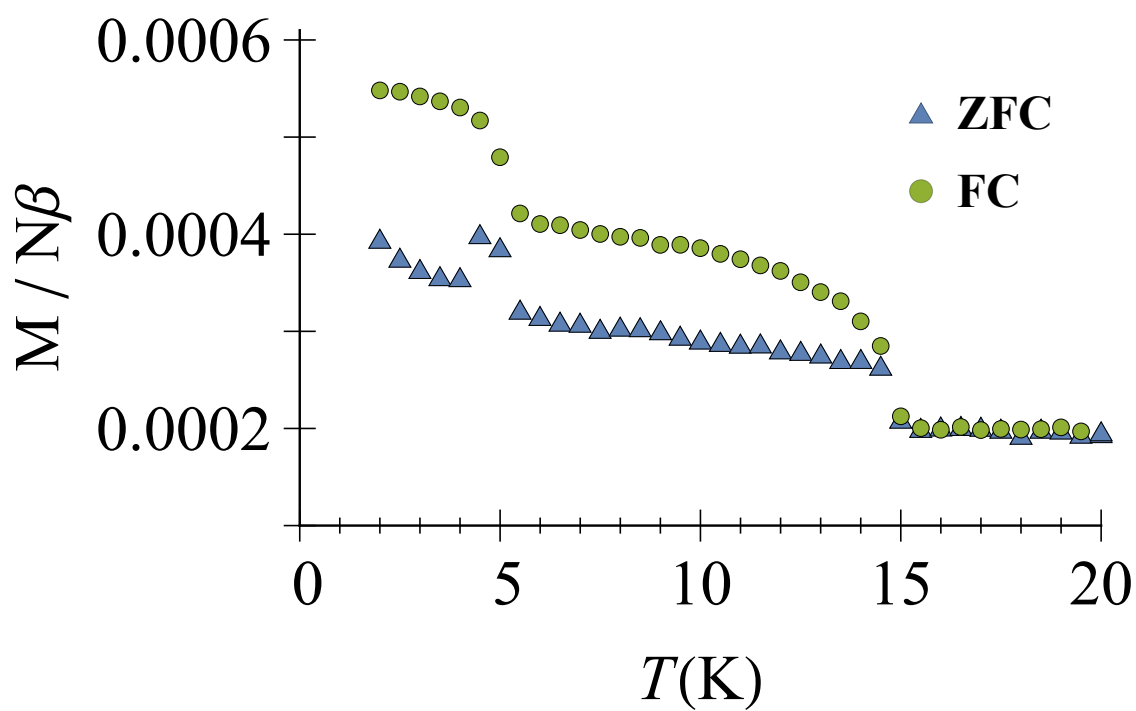

ZFC/FC curves measured at 30 Oe for 1.

|    | Ising | XY                         | Heisenberg |
|----|-------|----------------------------|------------|
| 1D | No    | No                         | No         |
| 2D | Yes   | KT transition <sup>1</sup> | No         |
| 3D | Yes   | Yes                        | Yes        |

---

Magnetic ordering v. dimensionality of a network and magnetic anisotropy.

<sup>1</sup>J. M. Kosterlitz and D. J. Thouless, *J. Phys. C: Solid State Phys.*, 1973, **6**, 1181.
